# Supplementary material for: How can community participation strengthen a health insurance system? The case of health insurer’s user associations in Colombia
Source: HighWire-hosted journal article supplement (doi:10.1136/bmjgh-2022-009571), 2022-09-01
Supplement: bmjgh-2022-009571supp001_data_supplement.pdf [file bmjgh-2022-009571supp001_data_supplement.pdf]

**Knowledge and Use of Participation Mechanisms**

|                                          | N    | Total |       | Contributory |       | Subsidized |       | t-test<br>p-value |
|------------------------------------------|------|-------|-------|--------------|-------|------------|-------|-------------------|
|                                          |      | %     | SE    | %            | SE    | %          | SE    |                   |
| <b>User Association</b>                  |      |       |       |              |       |            |       |                   |
| Knows any user association               | 1311 | 10.1  | 0.005 | 11.7         | 0.008 | 8.4        | 0.007 |                   |
| Has participated in any user association | 1311 | 2.1   | 0.003 | 1.5          | 0.003 | 2.7        | 0.004 |                   |

Note: \* p-value <0.1, \*\* p-value < 0.05, \*\*\* p-value <0.01

**Sample Characteristics**

|                                      | INSURANCE REGIME |                        | TOTAL |
|--------------------------------------|------------------|------------------------|-------|
|                                      | Contributory     | Subsidized<br>(Sisben) |       |
|                                      | %                | %                      | %     |
| <b>Age</b>                           |                  |                        |       |
| 18 to 25                             | 14               | 11                     | 13    |
| 26 to 40                             | 27               | 29                     | 28    |
| 41 to 55                             | 23               | 26                     | 25    |
| 56 to 65                             | 19               | 19                     | 19    |
| 66 to 88                             | 17               | 14                     | 15    |
| N/R                                  | 0                | 1                      | 0     |
| <b>Sex</b>                           |                  |                        |       |
| Male                                 | 47               | 49                     | 48    |
| Female                               | 53               | 51                     | 52    |
| <b>Education</b>                     |                  |                        |       |
| None                                 | 1                | 5                      | 3     |
| Primary incomplete                   | 9                | 20                     | 14    |
| Primary complete                     | 6                | 12                     | 9     |
| Secondary incomplete                 | 7                | 12                     | 9     |
| Secondary complete                   | 16               | 24                     | 20    |
| Technical incomplete                 | 3                | 5                      | 4     |
| Technical complete                   | 15               | 8                      | 12    |
| University incomplete                | 7                | 5                      | 6     |
| University complete (Professional)   | 22               | 7                      | 14    |
| Specialization, Masters or Doctorate | 15               | 2                      | 9     |
| N/R                                  | 1                | 1                      | 1     |
| <b>Region</b>                        |                  |                        |       |
| Caribbean                            | 13               | 31                     | 22    |
| Antioquia + Eje Cafetero             | 24               | 15                     | 19    |
| Bogotá                               | 29               | 6                      | 18    |
| Pacific                              | 13               | 19                     | 16    |
| Central                              | 12               | 15                     | 14    |
| East                                 | 9                | 14                     | 11    |

|                                     |            |            |            |
|-------------------------------------|------------|------------|------------|
| <b>Socioeconomic Strata</b>         |            |            |            |
| Strata 1                            | 19         | 56         | 37         |
| Strata 2                            | 29         | 35         | 31         |
| Strata 3                            | 33         | 8          | 21         |
| Strata 4                            | 12         | 1          | 7          |
| Strata 5                            | 5          | 0          | 3          |
| Strata 6                            | 2          | 0          | 1          |
| <b>Has communication tools:</b>     |            |            |            |
| Email                               | 73         | 47         | 60         |
| Text message                        | 81         | 71         | 77         |
| Smartphone                          | 77         | 60         | 68         |
| Computer                            | 61         | 23         | 42         |
| Internet Access                     | 82         | 47         | 65         |
| <b>Time enrolled in current EPS</b> |            |            |            |
| Less than 6 months                  | 8          | 5          | 6          |
| 6 months to 1 year                  | 7          | 9          | 8          |
| >1 year to 2 years                  | 13         | 10         | 12         |
| >2 years to 5 years                 | 19         | 20         | 20         |
| >5 years                            | 53         | 56         | 54         |
| <b>Last time used EPS services</b>  |            |            |            |
| Less than 6 months                  | 61         | 50         | 56         |
| 6 months to 1 year                  | 22         | 27         | 25         |
| >1 year to 2 years                  | 7          | 12         | 9          |
| >2 years to 5 years                 | 4          | 7          | 5          |
| >5 years                            | 3          | 2          | 2          |
| Never                               | 3          | 2          | 3          |
| <b>Diagnosed with NCD</b>           | 29         | 17         | 23         |
| Total Interviewed                   | 666        | 645        | 1,311      |
| Population represented              | 16,795,014 | 15,723,832 | 32,518,930 |
| %                                   | 52         | 48         | 100        |
