# Supplementary material for: How can community participation strengthen a health insurance system? The case of health insurer’s user associations in Colombia
Source: HighWire-hosted journal article supplement (doi:10.1136/bmjgh-2022-009571), 2022-09-01
Supplement: bmjgh-2022-009571supp003_data_supplement.pdf [file bmjgh-2022-009571supp003_data_supplement.pdf]

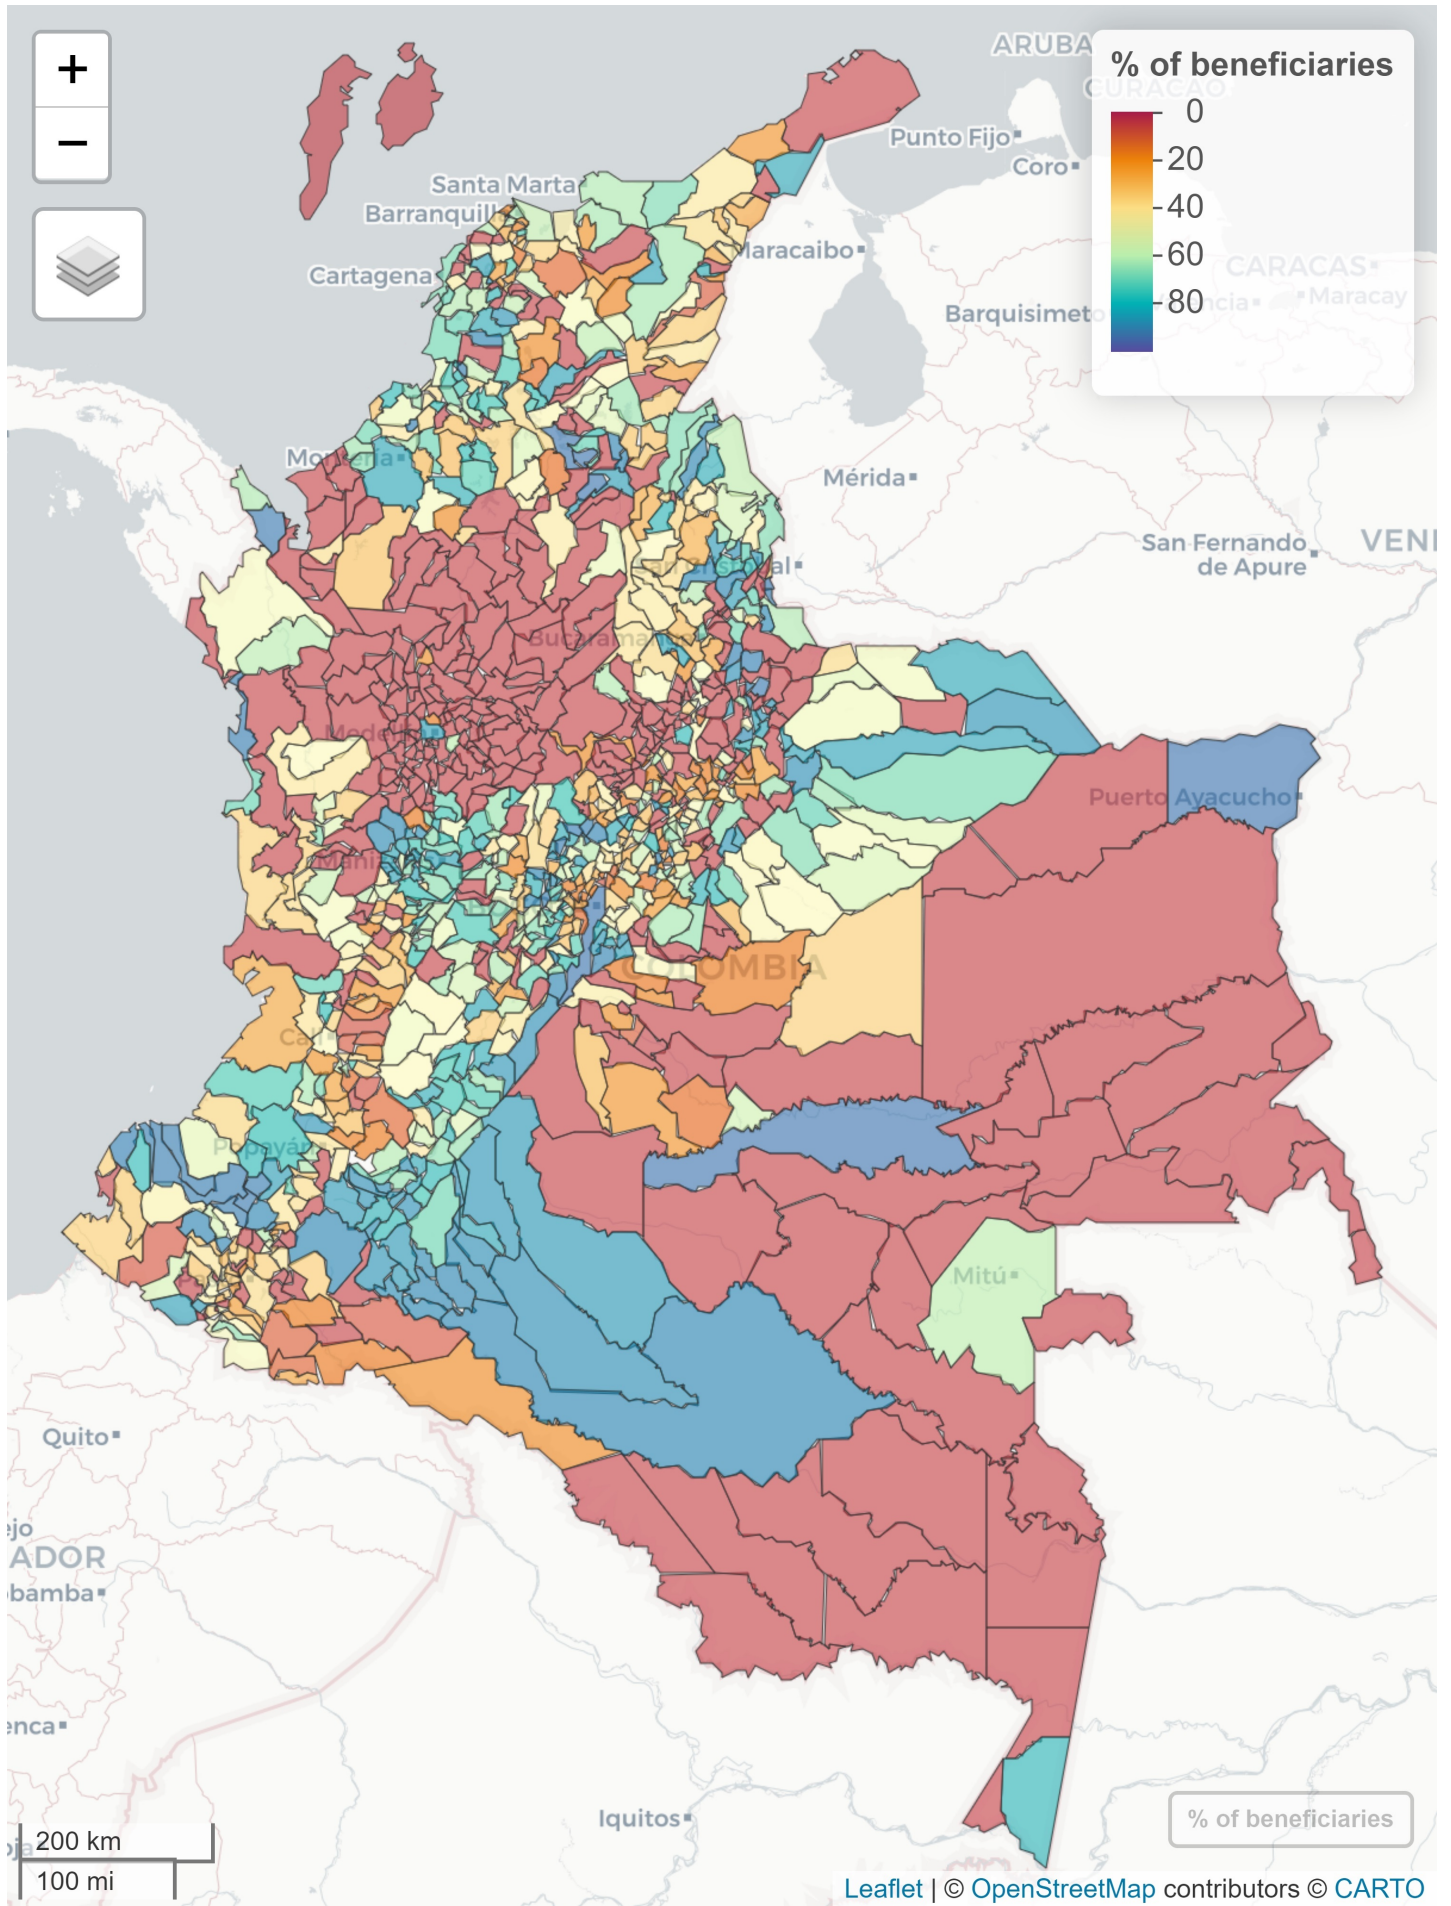

Leaflet | © OpenStreetMap contributors © CARTO
